# Supplementary material for: HIV-1 Superinfection in Women Broadens and Strengthens the Neutralizing Antibody Response
Source: PubMed Central journal article supplement (PMC3315492; doi:10.1371/journal.ppat.1002611), 2012-03-29
Supplement: ppat.1002611.s001.pdf [file ppat.1002611.s001.pdf]

|                                  |                                           | <b>Coefficient</b> | <b>95% CI</b> | <b>P value</b> |
|----------------------------------|-------------------------------------------|--------------------|---------------|----------------|
| <b>Simek scoring [9]<br/>GEE</b> | <b>8-virus panel</b>                      | 0.18               | (0.07-0.30)   | 0.002          |
|                                  | <b>Tier 2 viruses<sup>*</sup></b>         | 0.23               | (0.09-0.37)   | 0.002          |
|                                  | <b>Most resistant viruses<sup>^</sup></b> | 0.29               | (0.13-0.45)   | <0.0005        |
|                                  | <b>Medium sensitivity<sup>#</sup></b>     | 0.18               | (0.06-0.30)   | 0.003          |
|                                  | <b>Only subtype A</b>                     | 0.20               | (0.06-0.34)   | 0.005          |
|                                  | <b>Non-subtype A</b>                      | 0.16               | (0.07-0.26)   | 0.001          |
|                                  | <b>Sans SF162</b>                         | 0.20               | (0.07-0.33)   | 0.002          |
|                                  | <b>Sans Q461d1</b>                        | 0.20               | (0.08-0.33)   | 0.002          |
|                                  | <b>Sans Q769.b9</b>                       | 0.16               | (0.04-0.27)   | 0.006          |
|                                  | <b>Sans Q842.d16</b>                      | 0.19               | (0.08-0.31)   | 0.001          |
|                                  | <b>Sans Q259.d2.26</b>                    | 0.17               | (0.07-0.27)   | 0.001          |
|                                  | <b>Sans Q435.100M.a4</b>                  | 0.18               | (0.05-0.30)   | 0.007          |
|                                  | <b>Sans Q406.70M.f3</b>                   | 0.18               | (0.07-0.28)   | 0.001          |
|                                  | <b>Sans DU156.12</b>                      | 0.19               | (0.07-0.31)   | 0.002          |

|                                                  |                                           | <b>RR</b> | <b>95% CI</b> | <b>P value</b> |
|--------------------------------------------------|-------------------------------------------|-----------|---------------|----------------|
| <b>Blish scoring [13]<br/>Poisson regression</b> | <b>8-virus panel</b>                      | 1.68      | (1.25-2.26)   | 0.001          |
|                                                  | <b>Tier 2 viruses<sup>*</sup></b>         | 1.80      | (1.28-2.52)   | 0.001          |
|                                                  | <b>Most resistant viruses<sup>^</sup></b> | 1.91      | (1.19-3.07)   | 0.007          |
|                                                  | <b>Medium sensitivity<sup>#</sup></b>     | 1.80      | (1.29-2.51)   | 0.001          |
|                                                  | <b>Only subtype A</b>                     | 1.65      | (1.20-2.26)   | 0.002          |
|                                                  | <b>Non-subtype A</b>                      | 1.72      | (1.26-2.35)   | 0.001          |
|                                                  | <b>Sans SF162</b>                         | 1.75      | (1.28-2.40)   | <0.0005        |
|                                                  | <b>Sans Q461d1</b>                        | 1.71      | (1.25-2.34)   | 0.001          |
|                                                  | <b>Sans Q769.b9</b>                       | 1.62      | (1.18-2.23)   | 0.003          |
|                                                  | <b>Sans Q842.d16</b>                      | 1.36      | (1.30-1.42)   | <0.0005        |
|                                                  | <b>Sans Q259.d2.26</b>                    | 1.37      | (1.31-1.42)   | <0.0005        |
|                                                  | <b>Sans Q435.100M.a4</b>                  | 1.62      | (1.18-2.23)   | 0.003          |
|                                                  | <b>Sans Q406.70M.f3</b>                   | 1.38      | (1.32-1.45)   | <0.0005        |
|                                                  | <b>Sans DU156.12</b>                      | 1.71      | (1.25-2.34)   | 0.001          |

<sup>\*</sup>Excluding SF162 and Q461d1

<sup>^</sup>Q769.b9, Q259.d2.d26, Q435.100M.a4

<sup>#</sup>Q842.d16, Q435.100M.a4, Q406.70M.f3, DU156.12
