# Supplementary material for: HIV-1 Superinfection in Women Broadens and Strengthens the Neutralizing Antibody Response
Source: PubMed Central journal article supplement (PMC3315492; doi:10.1371/journal.ppat.1002611), 2012-03-29
Supplement: ppat.1002611.s002.pdf [file ppat.1002611.s002.pdf]

| <b>Dilution</b>  | <b>RR</b> | <b>95% CI</b> | <b>P value</b> |
|------------------|-----------|---------------|----------------|
| Serial dilutions | 1.68      | (1.25-2.26)   | 0.001          |
| 1:100            | 1.70      | (1.30-2.28)   | 0.001          |
| 1:200            | 1.55      | (1.14-2.11)   | 0.005          |
| 1:400            | 1.58      | (1.16-2.13)   | 0.004          |
