# Supplementary material for: HIV-1 Superinfection in Women Broadens and Strengthens the Neutralizing Antibody Response
Source: PubMed Central journal article supplement (PMC3315492; doi:10.1371/journal.ppat.1002611), 2012-03-29
Supplement: ppat.1002611.s003.pdf [file ppat.1002611.s003.pdf]

| <b>Dilution</b> | <b>Rho</b> | <b>P value</b> |
|-----------------|------------|----------------|
| 1:100           | 0.85       | <0.0005        |
| 1:200           | 0.88       | <0.0005        |
| 1:400           | 0.76       | <0.0005        |
